# Supplementary material for: From Interconnection between Genes and Microenvironment to Novel Immunotherapeutic Approaches in Upper Gastro-Intestinal Cancers—A Multidisciplinary Perspective
Source: PubMed Central journal article supplement (PMC7465773; doi:10.3390/cancers12082105), 2020-07-29
Supplement: cancers-12-02105-s001.pdf [file cancers-12-02105-s001.pdf]

## Supplementary material

### Oesophageal cancer.

The currently AJCC 8<sup>th</sup> edition staging of oesophageal, esophagogastric and gastric epithelial cancer includes three different staging groups: i) the clinical (cTNM) stage group, which considers depth of primary tumour invasion (T), regional lymph node involvement (N) and presence of metastases (M) (Suppl. Fig.1 and 2); ii) the pathologic (pTNM) stage group, which also includes histologic grading; iii) the newly introduced post-neoadjuvant pathologic (ypTNM) stage group (Suppl. Fig.3), referred to patients who have undergone neoadjuvant therapy and pathologic review of the resection specimen, since tumor responsiveness to neoadjuvant therapy drives survival outcomes. Tumor cell grading is defined in Suppl. Tab. 3. The definition of the esophagogastric junction has been revised in the 8th edition such that cancers involving it with epicenters no more than 2 cm into the gastric cardia are staged as carcinomas of the oesophagus and those with more than 2-cm involvement of the gastric cardia are staged as stomach cancers. A new regional lymph node map has been developed to keep out lung lymph node stations included in the 7th edition of AJCC staging system. Regional lymph nodes include lower cervical paratracheal, upper/lower paratracheal, subcarinal, upper/middle/lower thoracic paraesophageal, pulmonary ligament, diaphragmatic, paracardial, left gastric, common hepatic, splenic, celiac and cervical periesophageal level VI/VII nodes. Moreover, ESCC is subdivided based on the location: i) X: Location unknown, ii) Upper: Cervical oesophagus to lower border of azygous vein, iii) Middle: Lower border of azygous vein to lower border of inferior pulmonary vein, iv) Lower: Lower border of inferior pulmonary vein to stomach, including gastroesophageal junction.

**Supplementary Table 1. TNM staging for oesophageal cancer.**

| <b>T (primary tumor)</b>        |                                                                                                                                                                                                                                                                                                                 |
|---------------------------------|-----------------------------------------------------------------------------------------------------------------------------------------------------------------------------------------------------------------------------------------------------------------------------------------------------------------|
| <b>T<sub>x</sub></b>            | Tumor cannot be assessed                                                                                                                                                                                                                                                                                        |
| <b>T<sub>0</sub></b>            | No evidence of primary tumor                                                                                                                                                                                                                                                                                    |
| <b>T<sub>is</sub></b>           | High grade dysplasia, defined as malignant cells confined to the epithelium by the basement membrane                                                                                                                                                                                                            |
| <b>T<sub>1</sub></b>            | Tumor invades the lamina propria, <sup>1</sup> muscularis mucosae or submucosa <ul style="list-style-type: none"> <li>• <b>T<sub>1a</sub></b>: Tumor invades the lamina propria or muscularis mucosae</li> <li>• <b>T<sub>1b</sub></b>: Tumor invades the submucosa</li> </ul>                                  |
| <b>T<sub>2</sub></b>            | Tumor invades the muscularis propria                                                                                                                                                                                                                                                                            |
| <b>T<sub>3</sub></b>            | Tumor invades adventitia                                                                                                                                                                                                                                                                                        |
| <b>T<sub>4</sub></b>            | Tumor invades adjacent structures <ul style="list-style-type: none"> <li>• <b>T<sub>4a</sub></b>: Tumor invades the pleura, pericardium, azygos vein, diaphragm or peritoneum</li> <li>• <b>T<sub>4b</sub></b>: Tumor invades other adjacent structures, such as the aorta, vertebral body or airway</li> </ul> |
| <b>N (regional lymph nodes)</b> |                                                                                                                                                                                                                                                                                                                 |
| <b>N<sub>x</sub></b>            | Regional lymph nodes cannot be assessed                                                                                                                                                                                                                                                                         |
| <b>N<sub>0</sub></b>            | No regional lymph node metastasis                                                                                                                                                                                                                                                                               |
| <b>N<sub>1</sub></b>            | Metastasis in 1 or 2 regional lymph nodes                                                                                                                                                                                                                                                                       |
| <b>N<sub>2</sub></b>            | Metastasis in 3 - 6 regional lymph nodes                                                                                                                                                                                                                                                                        |
| <b>N<sub>3</sub></b>            | Metastasis in 7+ regional lymph nodes                                                                                                                                                                                                                                                                           |
| <b>M (distant metastases)</b>   |                                                                                                                                                                                                                                                                                                                 |
| <b>M<sub>0</sub></b>            | No distant metastasis                                                                                                                                                                                                                                                                                           |
| <b>M<sub>1</sub></b>            | Distant metastasis                                                                                                                                                                                                                                                                                              |

**Supplementary Table 2. TNM stage grouping for oesophageal cancer.**

| <b>Squamous cell clinical staging</b> |         |         |     |
|---------------------------------------|---------|---------|-----|
| <b>0</b>                              | cTis    | cN0     | cM0 |
| <b>I</b>                              | cT1     | cN0 - 1 | cM0 |
| <b>II</b>                             | cT2     | cN0 - 1 | cM0 |
|                                       | cT3     | cN0     | cM0 |
| <b>III</b>                            | cT3     | cN1     | cM0 |
|                                       | cT1 - 3 | cN2     | cM0 |
| <b>IVA</b>                            | cT4     | cN0 - 2 | cM0 |
|                                       | any cT  | cN3     | cM0 |
| <b>IVB</b>                            | any cT  | any cN  | cM1 |

  

| <b>Squamous cell pathological staging</b> |        |         |     |            |                |
|-------------------------------------------|--------|---------|-----|------------|----------------|
| <b>0</b>                                  | pTis   | pN0     | pM0 | G N/A      | any location   |
| <b>IA</b>                                 | pT1a   | pN0     | pM0 | G1, GX     | any location   |
| <b>IB</b>                                 | pT1a   | pN0     | pM0 | G2 - 3     | any location   |
|                                           | pT1b   | pN0     | pM0 | G1 - 3, GX | any location   |
|                                           | pT2    | pN0     | pM0 | G1         | any location   |
| <b>IIA</b>                                | pT2    | pN0     | pM0 | G2 - 3, GX | any location   |
|                                           | pT3    | pN0     | pM0 | any G      | lower          |
|                                           | pT3    | pN0     | pM0 | G1         | upper / middle |
| <b>IIB</b>                                | pT3    | pN0     | pM0 | G2 - 3     | upper / middle |
|                                           | pT3    | pN0     | pM0 | GX         | any location   |
|                                           | pT3    | pN0     | pM0 | any G      | location X     |
|                                           | pT1    | pN1     | pM0 | any G      | any location   |
| <b>IIIA</b>                               | pT1    | pN2     | pM0 | any G      | any location   |
|                                           | pT2    | pN1     | pM0 | any G      | any location   |
| <b>IIIB</b>                               | pT2    | pN2     | pM0 | any G      | any location   |
|                                           | pT3    | pN1 - 2 | pM0 | any G      | any location   |
|                                           | pT4a   | pN0 - 1 | pM0 | any G      | any location   |
| <b>IVA</b>                                | pT4a   | pN2     | pM0 | any G      | any location   |
|                                           | pT4b   | pN0 - 2 | pM0 | any G      | any location   |
|                                           | any pT | pN3     | pM0 | any G      | any location   |
| <b>IVB</b>                                | any pT | any pN  | pM1 | any G      | any location   |

  

| <b>Adenocarcinoma clinical staging</b> |          |         |     |
|----------------------------------------|----------|---------|-----|
| <b>0</b>                               | cTis     | cN0     | cM0 |
| <b>I</b>                               | cT1      | cN0     | cM0 |
| <b>IIA</b>                             | cT1      | cN1     | cM0 |
| <b>IIB</b>                             | cT2      | cN0     | cM0 |
| <b>III</b>                             | cT2      | cN1     | cM0 |
|                                        | cT3      | cN0 - 1 | cM0 |
|                                        | cT4a     | cN0 - 1 | cM0 |
| <b>IVA</b>                             | cT1 - 4a | cN2     | cM0 |
|                                        | cT4b     | cN0 - 2 | cM0 |
|                                        | any cT   | cN3     | cM0 |
| <b>IVB</b>                             | any cT   | any cN  | cM1 |

  

| <b>Adenocarcinoma pathological staging</b> |        |         |     |            |
|--------------------------------------------|--------|---------|-----|------------|
| <b>0</b>                                   | pTis   | pN0     | pM0 | G N/A      |
| <b>IA</b>                                  | pT1a   | pN0     | pM0 | G1, GX     |
| <b>IB</b>                                  | pT1a   | pN0     | pM0 | G2         |
|                                            | pT1b   | pN0     | pM0 | G1 - 2, GX |
| <b>IC</b>                                  | pT1    | pN0     | pM0 | G3         |
|                                            | pT2    | pN0     | pM0 | G1 - 2     |
| <b>IIA</b>                                 | pT2    | pN0     | pM0 | G3, GX     |
| <b>IIB</b>                                 | pT1    | pN1     | pM0 | any G      |
|                                            | pT3    | pN0     | pM0 | any G      |
| <b>IIIA</b>                                | pT1    | pN2     | pM0 | any G      |
|                                            | pT2    | pN1     | pM0 | any G      |
| <b>IIIB</b>                                | pT2    | pN2     | pM0 | any G      |
|                                            | pT3    | pN1 - 2 | pM0 | any G      |
|                                            | pT4a   | pN0 - 1 | pM0 | any G      |
| <b>IVA</b>                                 | pT4a   | pN2     | pM0 | any G      |
|                                            | pT4b   | pN0 - 2 | pM0 | any G      |
|                                            | any pT | pN3     | pM0 | any G      |
| <b>IVB</b>                                 | any pT | any pN  | pM1 | any G      |

**Supplementary Table 3. Post-neoadjuvant pathologic stage grouping.**

| <b>Squamous cell/adenocarcinoma pathologic staging following neoadjuvant therapy</b> |          |             |      |
|--------------------------------------------------------------------------------------|----------|-------------|------|
| <b>I</b>                                                                             | ypT0 - 2 | ypN0        | ypM0 |
| <b>II</b>                                                                            | ypT3     | ypN0        | ypM0 |
| <b>IIIA</b>                                                                          | ypT0 - 2 | ypN1        | ypM0 |
|                                                                                      | ypT3     | ypN1        | ypM0 |
|                                                                                      | ypT0 - 3 | ypN2        | ypM0 |
|                                                                                      | ypT4a    | ypN0        | ypM0 |
| <b>IVA</b>                                                                           | ypT4a    | ypN1 - 2, X | ypM0 |
|                                                                                      | ypT4b    | ypN0 - 2    | ypM0 |
|                                                                                      | any ypT  | ypN3        | ypM0 |
| <b>IVB</b>                                                                           | any ypT  | any ypN     | ypM1 |

**Supplementary Table 4. Tumor cell grading for oesophageal cancer.**

|           | <b>Adenocarcinoma</b>                                                                                                            | <b>Squamous cell carcinoma</b>                                                                                                                                                                                                                                                                                 |
|-----------|----------------------------------------------------------------------------------------------------------------------------------|----------------------------------------------------------------------------------------------------------------------------------------------------------------------------------------------------------------------------------------------------------------------------------------------------------------|
| <b>GX</b> | Differentiation cannot be assessed                                                                                               | Differentiation cannot be assessed                                                                                                                                                                                                                                                                             |
| <b>G1</b> | Well differentiated, with >95% of the tumour composed of well-formed glands                                                      | Well differentiated; prominent keratinization with pearl formation and a minor component of non-keratinizing basal-like cells, tumour cells arranged in sheets and mitotic counts low                                                                                                                          |
| <b>G2</b> | Moderately differentiated, with 50-95% of the tumor showing gland formation                                                      | Moderately differentiated with variable histologic features ranging from parakeratotic to poorly keratinizing lesions and pearl formation generally absent                                                                                                                                                     |
| <b>G3</b> | Poorly differentiated, with tumors composed of nest and sheets of cells with <50% of the tumor demonstrating glandular formation | Poorly differentiated, consisting predominantly of basal like cells forming large and small nests with frequent central necrosis and with the nests consisting of sheets or pavement-like arrangements of tumor cells that are occasionally punctuated by small numbers of parakeratotic or keratinizing cells |

**Gastric cancer.**

**Supplementary Table 5. TNM staging for oesophageal cancer.**

Regional lymph nodes include the greater curvature, greater omental, lesser curvature, lesser omental, right and left peracardial (cardioesophageal), suprapyloric, gastroduodenal, infrapyloric, gastroepiploic, left gastric artery, celiac artery, common hepatic artery, hepatoduodenal, portal, splenic artery, and splenic hilum nodes

| <b>T (primary tumor)</b>        |                                                                                                                                                                                                                                                  |
|---------------------------------|--------------------------------------------------------------------------------------------------------------------------------------------------------------------------------------------------------------------------------------------------|
| <b>Tx</b>                       | No evidence of primary tumor                                                                                                                                                                                                                     |
| <b>T0</b>                       | No evidence of primary tumor                                                                                                                                                                                                                     |
| <b>Tis</b>                      | Carcinoma in situ: intraepithelial tumor without invasion of the lamina propria; high grade dysplasia                                                                                                                                            |
| <b>T1</b>                       | Tumor invades the lamina propria, muscularis mucosae or submucosa <ul style="list-style-type: none"> <li><b>T1a:</b> Tumor invades the lamina propria or muscularis mucosae</li> <li><b>T1b:</b> Tumor invades the submucosa</li> </ul>          |
| <b>T2</b>                       | Tumor invades the muscularis propria                                                                                                                                                                                                             |
| <b>T3</b>                       | Tumor penetrates the subserosal connective tissue without invasion of the visceral peritoneum or adjacent structures                                                                                                                             |
| <b>T4</b>                       | Tumor invades the serosa (visceral peritoneum) or adjacent structures <ul style="list-style-type: none"> <li><b>T4a:</b> Tumor invades the serosa (visceral peritoneum)</li> <li><b>T4b:</b> Tumor invades adjacent structures/organs</li> </ul> |
| <b>N (regional lymph nodes)</b> |                                                                                                                                                                                                                                                  |
| <b>Nx</b>                       | Regional lymph nodes cannot be assessed                                                                                                                                                                                                          |
| <b>N0</b>                       | No regional lymph node metastasis                                                                                                                                                                                                                |
| <b>N1</b>                       | Metastasis in one or two regional lymph nodes                                                                                                                                                                                                    |
| <b>N2</b>                       | Metastasis in three to six regional lymph nodes                                                                                                                                                                                                  |
| <b>N3</b>                       | Metastasis in seven or more regional lymph nodes <ul style="list-style-type: none"> <li><b>N3a:</b> Metastasis in seven to 15 regional lymph nodes</li> <li><b>N3b:</b> Metastasis in 16 or more regional lymph nodes</li> </ul>                 |
| <b>M (distant metastases)</b>   |                                                                                                                                                                                                                                                  |
| <b>M0</b>                       | No distant metastasis                                                                                                                                                                                                                            |
| <b>M1</b>                       | Distant metastasis                                                                                                                                                                                                                               |

**Supplementary Table 6. Pathologic TNM staging (A) and grouping (B) for gastric cancer.**

| <b>A-Pathologic staging</b> |          |          |          |
|-----------------------------|----------|----------|----------|
|                             | <b>T</b> | <b>N</b> | <b>M</b> |
| <b>0</b>                    | Tis      | N0       | M0       |
| <b>IA</b>                   | T1       | N0       | M0       |
| <b>IB</b>                   | T1       | N1       | M0       |
|                             | T2       | N0       | M0       |
| <b>IIA</b>                  | T1       | N2       | M0       |
|                             | T2       | N1       | M0       |
|                             | T3       | N0       | M0       |
| <b>IIB</b>                  | T1       | N3a      | M0       |
|                             | T2       | N2       | M0       |
|                             | T3       | N1       | M0       |
|                             | T4a      | N0       | M0       |
| <b>IIIA</b>                 | T2       | N3a      | M0       |
|                             | T3       | N2       | M0       |
|                             | T4a      | N1-2     | M0       |
|                             | T4b      | N0       | M0       |
| <b>IIIB</b>                 | T1-2     | N3b      | M0       |
|                             | T3-4a    | N3a      | M0       |
|                             | T4b      | N1-2     | M0       |
| <b>IIIC</b>                 | T3-4a    | N3b      | M0       |
|                             | T4b      | N3a-3b   | M0       |
| <b>IV</b>                   | any T    | any N    | M1       |

| <b>B-Clinical groups</b> |          |          |          |
|--------------------------|----------|----------|----------|
|                          | <b>T</b> | <b>N</b> | <b>M</b> |
| <b>0</b>                 | Tis      | N0       | M0       |
| <b>I</b>                 | T1-2     | N0       | M0       |
| <b>IIA</b>               | T1-2     | N1-3     | M0       |
| <b>IIB</b>               | T3-4a    | N0       | M0       |
| <b>III</b>               | T3-4a    | N1-3     | M0       |
| <b>IVA</b>               | T4b      | N1-3     | M0       |
| <b>IVB</b>               | any T    | any N    | M1       |

**Supplementary Table 7. Pathologic staging following neoadjuvant therapy in gastric cancer.**

| <b>Pathologic staging following neoadjuvant therapy</b> |               |       |    |
|---------------------------------------------------------|---------------|-------|----|
| <b>I</b>                                                | T1-2          | N0    | M0 |
|                                                         | T1            | N1    | M0 |
| <b>II</b>                                               | T3-4a         | N0    | M0 |
|                                                         | T2-3          | N1    | M0 |
|                                                         | T1-2          | N2    | M0 |
|                                                         | T1            | N3    | M0 |
| <b>III</b>                                              | T4b           | N0    | M0 |
|                                                         | T4a-4b        | N1    | M0 |
|                                                         | T3, 4a, 4b    | N2    | M0 |
|                                                         | T2, 3, 4a, 4b | N3    | M0 |
| <b>IV</b>                                               | any T         | any N | M1 |
